# Supplementary material for: The inducible blockage of RNAi reveals a role for polyunsaturated fatty acids in the regulation of dsRNA-endocytic capacity in Bactrocera dorsalis
Source: PubMed Central journal article supplement (PMC5514080; doi:10.1038/s41598-017-05971-0), 2017-07-17
Supplement: 41598_2017_5971_MOESM1_ESM.pdf [file 41598_2017_5971_MOESM1_ESM.pdf]

## Supplementary Information

### **The inducible blockage of RNAi reveals a role for polyunsaturated fatty acids in the regulation of dsRNA-endocytic capacity in**

#### ***Bactrocera dorsalis***

Xiaolong Dong<sup>1</sup>, Xiaoxue Li<sup>1</sup>, Qiuji Li<sup>1</sup>, Hongmei Jia<sup>2</sup> and Hongyu Zhang<sup>1,\*</sup>

<sup>1</sup>State Key Laboratory of Agricultural Microbiology, Institute of Urban and Horticultural Entomology, College of Plant Science and Technology, Huazhong Agricultural University, Wuhan 430070, Hubei, People's Republic of China.

<sup>2</sup>Institute of Medicinal Plant Development, Chinese Academy of Medical Sciences and Peking Union Medical College, No. 151 Malianwa North Road, Haidian District, Beijing 100193, People's Republic of China.

\* Correspondence : hongyu.zhang@mail.hzau.edu.cn

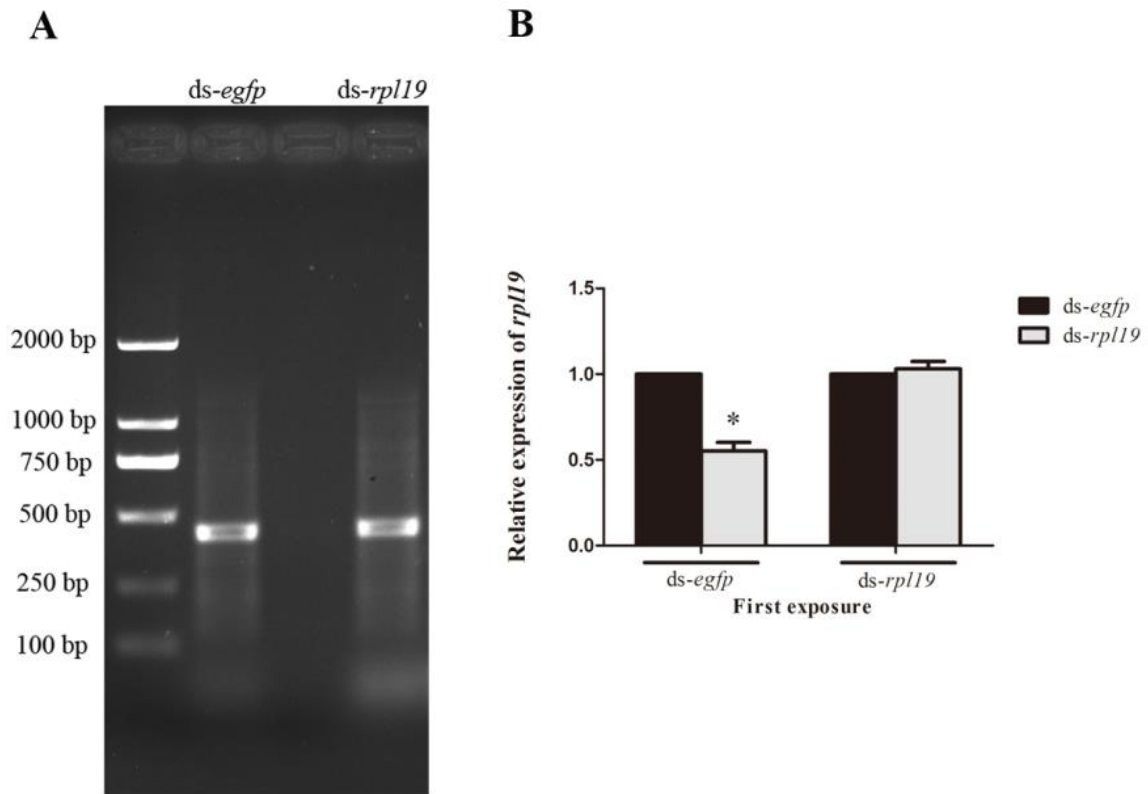

**Figure S1** Inducing the blockage of RNAi in *B. dorsalis* by feeding with dsRNA. **(A)** The agarose gel electrophoresis of dsRNA applied in feeding experiments prepared by bacteria. **(B)** The blockage of RNAi in the secondary exposure to ds-*rpl19* induced by *in vitro* transcribed dsRNAs. Normalized target gene mRNA accumulation is reported relative to the mRNA accumulation in the ds-*egfp* control, which was set to 1. All error bars represent the S.E. of the mean of three independent biological replicates. \* indicates a statistically significant difference in *rpl19* mRNA accumulation between the feeding ds-*rpl19* group and the control ds-*egfp* group ( $P < 0.05$ , Student's t-test).

**A**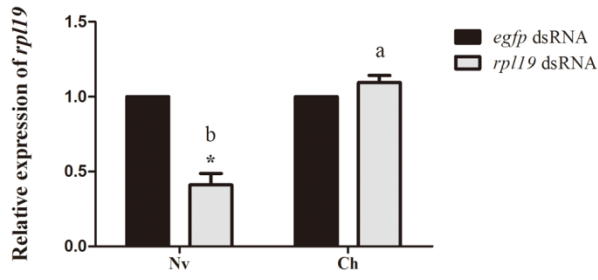**B**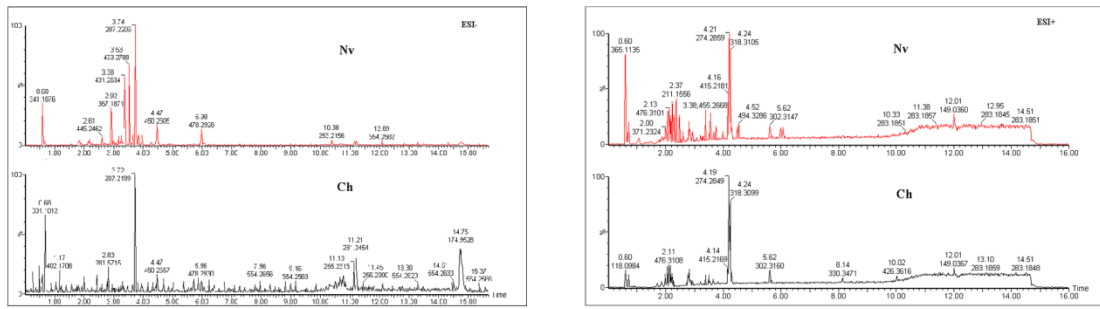**C**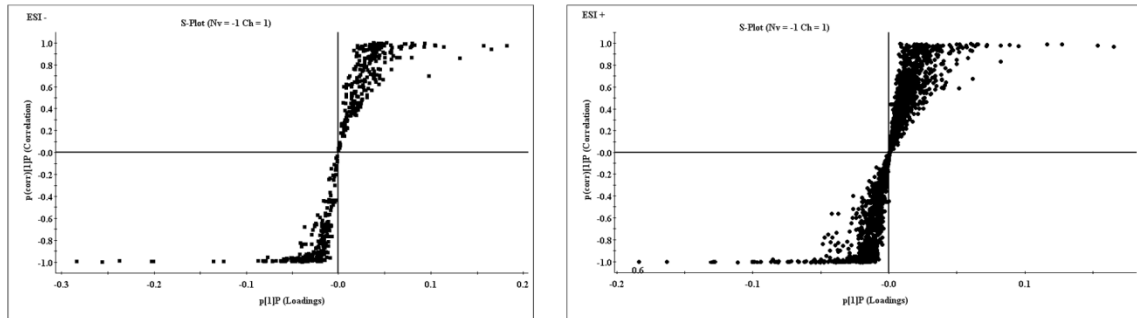**D**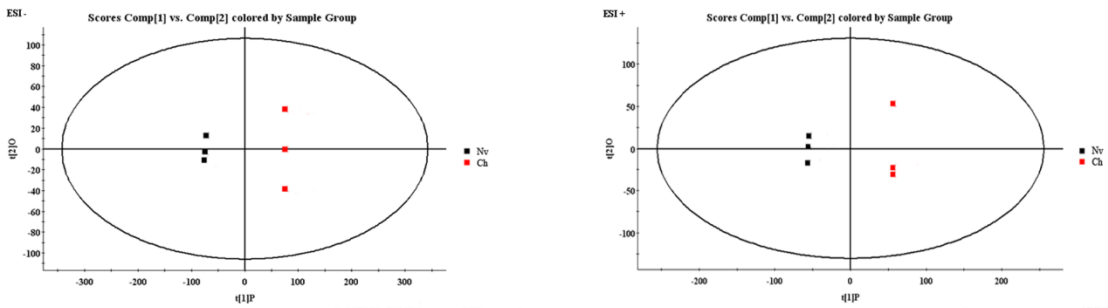

**Figure S2** The total ion current (TIC) profiles, S-plot, and OPLS-DA scores plot of the Nv and Ch *B.dorsalis* hemolymph samples. **(A)** The blockage of RNAi in the secondary exposure after initial priming with *ds-rpl19*. **(B)** Total ion current (TIC) profiles of Hemolymph from Nv (upper) and Ch *B. dorsalis* (lower) samples (UPLC/MS, analyses in both ESI + and ESI – mode). **(C)** S-plots of the Ch and Nv hemolymph samples as analyzed in ESI + and ESI – mode. **(D)** OPLS-DA scores plot separating Ch (red squares) and Nv (black squares) samples. Normalized target mRNA levels are reported relative to level of the *ds-egfp* control, which was set to 1. All error bars represent the S.E. of the mean of three independent biological replicates. \* indicates a statistically significant difference in *rpl19* expression between the feeding *ds-rpl19* group and the control *ds-egfp* group ( $P < 0.05$ , Student's t-test). Different letters indicate a significant difference in *rpl19* mRNA accumulation among the feeding *ds-rpl19* treatments ( $P < 0.05$ , Duncan's test).

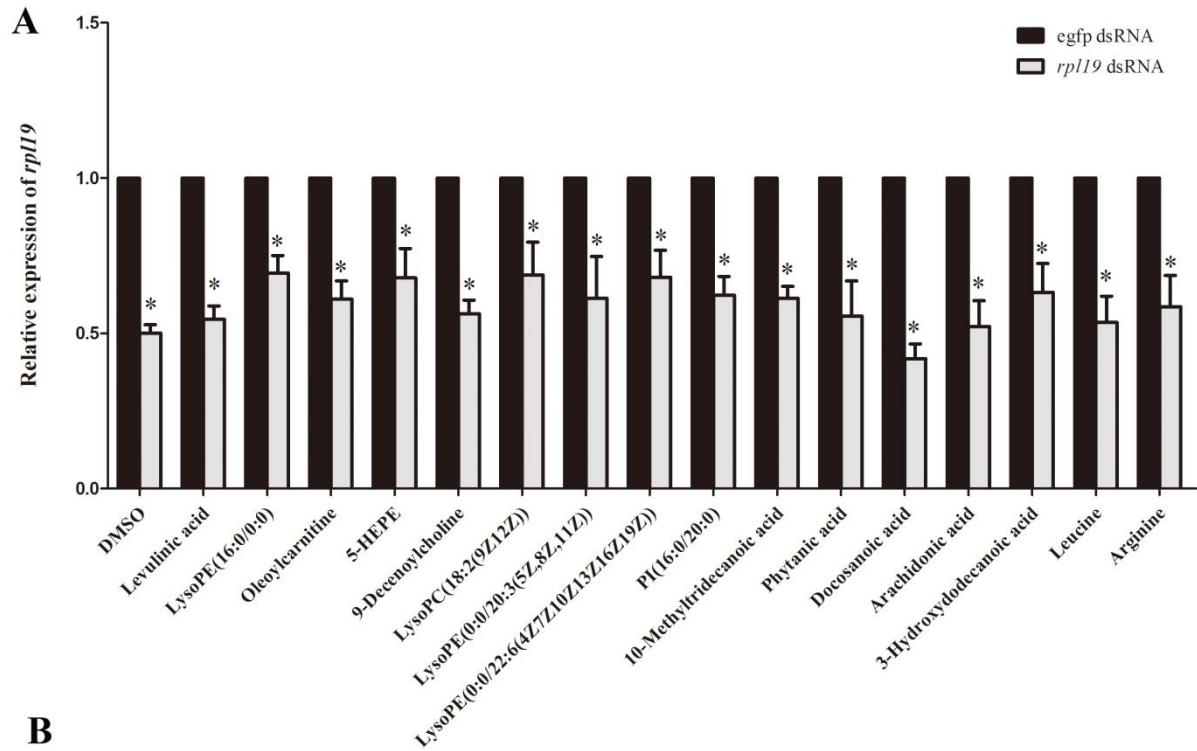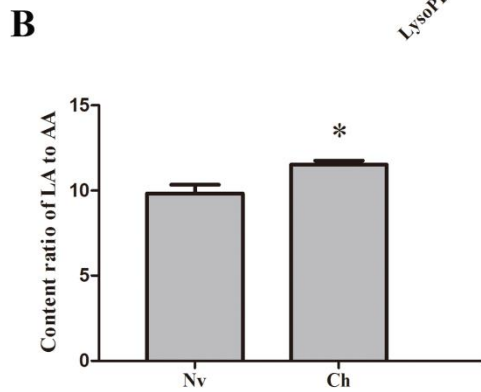

**Figure S3** The influence of up-regulated metabolites in Ch group to RNAi effect of *B. dorsalis*. **(A)** Feeding with dsRNA after injecting the up-regulated metabolites identified in the Ch group, the mRNA accumulation of the *rpl19*. **(B)** The LA:AA ratio after initial priming with ds-*rpl19*. Normalised target gene accumulation is reported relative to accumulation of the mRNA of the ds-*egfp* control, which was set to 1. All error bars represent the S.E. of the mean of three independent biological replicates. \* indicates a statistically significant difference in *fasn* mRNA accumulation between the feeding ds-*rpl19* group and the control ds-*egfp*, or between the injected ds-*fasn* group and the control ds-*egfp* ( $P < 0.05$ , Student's t-test).

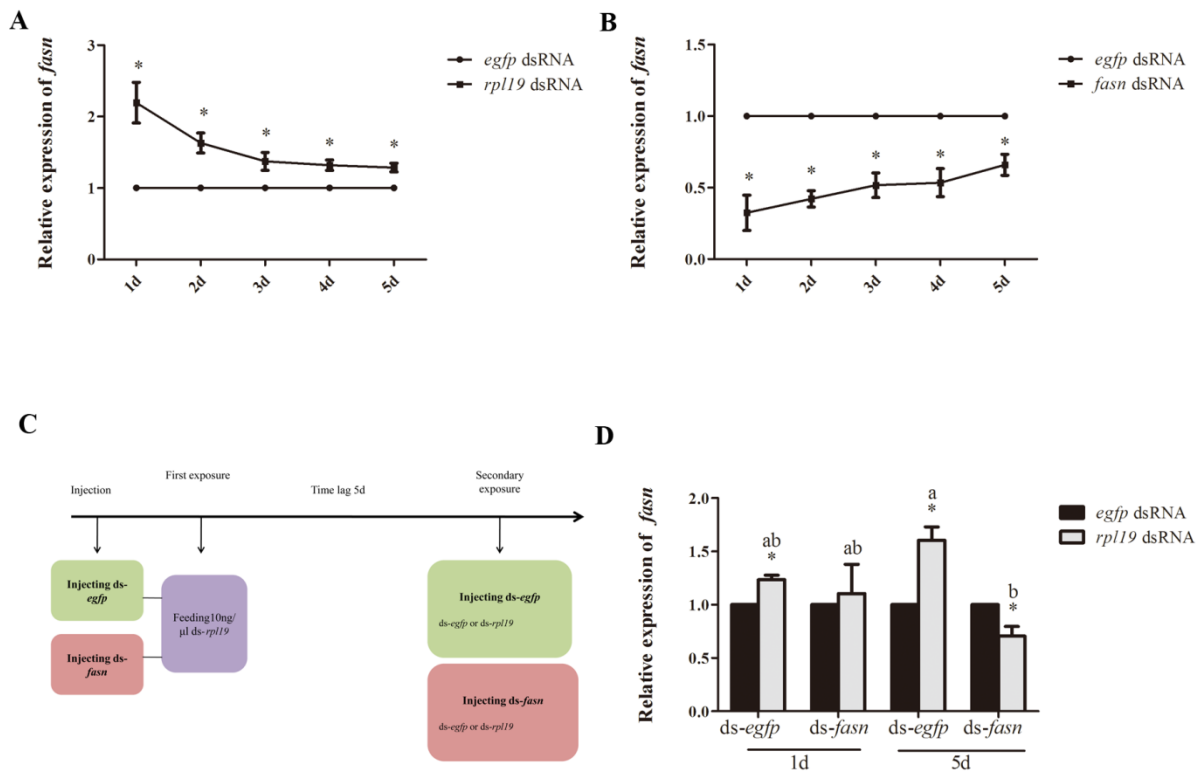

**Figure S4** The influence of feeding dsRNA on the accumulation of mRNA of the *fasn* gene. **(A)** *fasn* mRNA accumulation after feeding on ds-*rpl19*. **(B)** Accumulation of mRNA of the *fasn* gene after injecting ds-*fasn*. **(C)** Schematic representation of the experimental design. The timeline depicts the experimental process, in days. After injecting dsRNA, the flies were fed with 10 ng/μl ds-*rpl19*. The ds-*egfp* injected group and the ds-*fasn* injected group were fed with ds-*egfp* or ds-*rpl19* during the secondary exposure period. **(D)** accumulation of mRNA of the expression of the *fasn* gene after feeding on ds-*rpl19*, followed by injection with ds-*fasn*. Normalised target gene accumulation is reported relative to accumulation of the mRNA of the ds-*egfp* control, which was set to 1. All error bars represent the S.E. of the mean of three independent biological replicates. \* indicates a statistically significant difference in *fasn* mRNA accumulation between the feeding ds-*rpl19* group and the control ds-*egfp*, or between the injected ds-*fasn* group and the control ds-*egfp* ( $P < 0.05$ , Student's t-test). Different letters indicate a significant difference in *fasn* mRNA accumulation among the feeding ds-*rpl19* treatments ( $P < 0.05$ , Duncan's test).

**Table S1****The list of 37 metabolic features that have different abundance between Nv and Ch haemolymph**

|                                                | Metabolite                               | RT         | M/Z      | <i>P-value</i> | Content Ratio<br>(Ch / Nv) |
|------------------------------------------------|------------------------------------------|------------|----------|----------------|----------------------------|
| ESI-                                           | Levulinic acid                           | 2.02       | 116.0473 | 0.000          | 2.57 (up)                  |
|                                                | Aspartyllysine                           | 2.14       | 261.275  | 0.000          | 0.17 (down)                |
|                                                | <u>Prostaglandin G2</u>                  | 2.92       | 368.2198 | 0.000          | 0.04 (down)                |
|                                                | <u>3-hydroxypentadecanoic acid</u>       | 3.04       | 258.3969 | 0.002          | 0.12 (down)                |
|                                                | DG(18:2/22:6/0:0)                        | 3.25       | 664.5066 | 0.001          | 0.51 (down)                |
|                                                | <u>1-Palmitoylglycerophosphoinositol</u> | 3.65       | 572.2961 | 0.022          | 0.17 (down)                |
|                                                | Glucitol                                 | 4.24       | 318.3095 | 0.000          | 0.42 (down)                |
|                                                | <u>LysoPE(16:0/0:0)</u>                  | 4.43       | 453.2855 | 0.001          | 1.45 (up)                  |
|                                                | <u>1-Oleoylglycerophosphoinositol</u>    | 4.45       | 598.6604 | 0.000          | 0.02 (down)                |
|                                                | <u>LysoPE(16:1)</u>                      | 4.46       | 451.5344 | 0.000          | 0.53 (down)                |
|                                                | <u>LysoPC(16:1(9Z))</u>                  | 4.51       | 493.3168 | 0.000          | 0.03 (down)                |
|                                                | <u>Lysopc(18:1)</u>                      | 6.07       | 522.3572 | 0.001          | 0.33 (down)                |
|                                                | Oleoylcarnitine                          | 10.03      | 426.3628 | 0.000          | 1.24 (up)                  |
|                                                | 5-HEPE                                   | 10.41      | 318.2194 | 0.002          | 3.32 (up)                  |
|                                                | 9-Decenoylcholine                        | 11.15      | 256.4042 | 0.000          | 1.75 (up)                  |
|                                                | <u>Stearic acid</u>                      | 0.6        | 341.1071 | 0.000          | 0.32 (down)                |
|                                                | ESI+                                     | Creatinine | 1.07     | 155.0944       | 0.032                      |
| <u>PC(14:0/24:1(15Z))</u>                      |                                          | 2.15       | 280.2125 | 0.048          | 0.20 (down)                |
| Glutaryl glycine                               |                                          | 2.17       | 144.0933 | 0.000          | 0.09 (down)                |
| <u>LysoPC(18:2(9Z,12Z))</u>                    |                                          | 2.17       | 520.3343 | 0.002          | 1.74 (up)                  |
| <u>PC(18:4(6Z,9Z,12Z,15Z)/24:1(15Z))</u>       |                                          | 2.2        | 453.348  | 0.049          | 0.28 (down)                |
| <u>LysoPE(0:0/20:3(5Z,8Z,11Z))</u>             |                                          | 2.21       | 564.3581 | 0.02           | 1.39 (up)                  |
| <u>LysoPE(0:0/22:6(4Z,7Z,10Z,13Z,16Z,19Z))</u> |                                          | 2.25       | 608.3821 | 0.046          | 1.56 (up)                  |
| <u>PI(16:0/20:0)</u>                           |                                          | 2.76       | 456.2835 | 0.005          | 2.10 (up)                  |
| <u>Heptacosanoic acid</u>                      |                                          | 2.93       | 217.2069 | 0.006          | 0.36 (down)                |
| TG(14:0/18:4(6Z,9Z,12Z,15Z)/o-18:0)            |                                          | 3.26       | 279.2416 | 0.002          | 0.32 (down)                |
| <u>10-Methyltridecanoic acid</u>               |                                          | 3.5        | 246.2546 | 0.004          | 1.71 (up)                  |
| <u>Tricosanoic acid</u>                        |                                          | 3.54       | 219.2237 | 0.011          | 0.46 (down)                |
| <u>Caprylic acid</u>                           |                                          | 3.74       | 311.2289 | 0.000          | 0.48 (down)                |
| <u>LysoPE(16:1(9Z)/0:0)</u>                    |                                          | 4.48       | 452.2813 | 0.034          | 0.48 (down)                |
| <u>Phytanic acid</u>                           |                                          | 8.14       | 330.3455 | 0.036          | 1.51 (up)                  |
| <u>Docosanoic acid</u>                         |                                          | 10.66      | 358.3748 | 0.001          | 1.72 (up)                  |
| <u>Linoleic acid</u>                           |                                          | 11.21      | 281.2459 | 0.000          | 1.56 (up)                  |
| <u>Arachidonic acid</u>                        |                                          | 11.46      | 327.2109 | 0.042          | 1.31 (up)                  |
| <u>3-Hydroxydodecanoic acid</u>                |                                          | 12.39      | 239.1601 | 0.016          | 3.39 (up)                  |
| Leucine                                        |                                          | 14.72      | 158.9761 | 0.000          | 1.35 (up)                  |
| Arginine                                       | 14.74                                    | 174.9538   | 0.000    | 1.42 (up)      |                            |

The single and double underlines represent compounds of fatty acids and phospholipids respectively.

**Table S2**  
**Summary of DGE metrics from *B. dorsalis* transcriptomes.**

| Metrics     | Number         |                |                |                |
|-------------|----------------|----------------|----------------|----------------|
|             | Early set      |                | Late set       |                |
|             | Nv             | Ch             | Nv             | Ch             |
| Total reads | 6512317        | 5973846        | 6935363        | 5706874        |
| Clean reads | 6363092(97.7%) | 5793444(96.9%) | 6738861(97.1%) | 5613056(98.3%) |
| Length      | 100            | 100            | 100            | 100            |



**Table S5**  
**Summary of iTRAQ metrics from *B. dorsalis* proteomes**

| <b>Metrics</b>                   | <b>Number</b> |          |
|----------------------------------|---------------|----------|
| Total spectra                    | 323953        |          |
| Unique spectra                   | 45745         |          |
| Matched protein                  | 5358          |          |
| Differentially expressed protein | Early set     | Late set |
|                                  | 115           | 147      |
